# Supplementary material for: Cohort study of Covid-19 vaccine effectiveness among healthcare workers in Finland, December 2020 - October 2021
Source: bioRxiv or medRxiv preprint supplement (doi:10.1101/2021.11.03.21265791), 2021-11-08
Supplement: Supplementary file [file media-1.pdf]

**Supplementary Table 1:** Definition of medical conditions (highly) predisposing to severe Covid-19.

| Medical condition                                        | Classification | Codes                                                                                                                                                                                   | Register |
|----------------------------------------------------------|----------------|-----------------------------------------------------------------------------------------------------------------------------------------------------------------------------------------|----------|
| <b>Highly predisposing to severe Covid-19</b>            |                |                                                                                                                                                                                         |          |
| Organ or stem cell transplant                            | ICD-10         | T86, Z94                                                                                                                                                                                | 1, 2     |
| Active cancer treatment                                  | ICD-10         | C00–C97 (except C44), D05.1, D39                                                                                                                                                        | 1, 2     |
| Severe disorders of the immune system                    | ICD-10         | D70.8, D80–D84, E31.00                                                                                                                                                                  | 2        |
| Severe chronic renal disease                             | ICD-10         | I12, I13, N00–N05, N07, N08, N11, N14, N18, N19, E10.2, E11.2, E14.2                                                                                                                    | 1, 2     |
| Asthma requiring continuous medication                   | ICD-10         | J45, J46                                                                                                                                                                                | 2, 3     |
|                                                          | ICPC-2         | R96                                                                                                                                                                                     | 3        |
| Severe chronic pulmonary disease                         | ICD-10         | J41–J44, J47, Z90.2                                                                                                                                                                     | 2        |
| Type 2 diabetes mellitus requiring medication            | ICD-10         | E11, E13, E14                                                                                                                                                                           | 2, 3     |
|                                                          | ICPC-2         | T90                                                                                                                                                                                     | 3        |
| Blood glucose lowering drugs, excluding insulin          | ATC            | A10B                                                                                                                                                                                    | 4        |
| Down syndrome                                            | ICD-10         | Q90                                                                                                                                                                                     | 2, 3     |
| <b>Predisposing to severe Covid-19</b>                   |                |                                                                                                                                                                                         |          |
| Severe heart disease                                     | ICD-10         | I11–I13, I15, I20–I25, I50                                                                                                                                                              | 1, 2     |
| Neurological illness or condition that affects breathing | ICD-10         | G70–G73, G80–G83, I60–I69                                                                                                                                                               | 2        |
| Immunosuppressive drug therapy for autoimmune disease    |                |                                                                                                                                                                                         |          |
| Autoimmune disease                                       | ICD-10         | D86, K50, K51, L40, M02, M05–M07, M13.9, M45, M46.0, M46.1, M46.9, M94.1                                                                                                                | 1, 2     |
| Immunosuppressive drug therapy                           | ATC            | H02AB02, H02AB04, H02AB06, H02AB07, L01BA01, L01XC02, L04AA06, L04AA10, L04AA13, L04AA18, L04AA24, L04AA26, L04AA29, L04AA33, L04AA37, L04AB, L04AC, L04AD01, L04AD02, L04AX01, L04AX03 | 4        |
| Severe chronic liver disease                             | ICD-10         | K70.2, K70.3, K70.4, K71–K74                                                                                                                                                            | 2        |
| Type 1 diabetes                                          | ICD-10         | E10                                                                                                                                                                                     | 2, 3     |
|                                                          | ICPC-2         | T89                                                                                                                                                                                     | 3        |
| Insulin and analogues                                    | ATC            | A10A                                                                                                                                                                                    | 4        |
| Adrenal insufficiency                                    | ICD-10         | E25.0, E27.1, E27.2, E27.4, E31.00, E31.01, E31.08, E89.6                                                                                                                               | 1, 2     |
| Sleep apnea                                              | ICD-10         | G47.3                                                                                                                                                                                   | 2, 3     |
| Continuous positive airway pressure therapy              | NCSP           | WX723, WX780                                                                                                                                                                            | 2        |
| Psychotic disorders                                      | ICD-10         | F20–F29                                                                                                                                                                                 | 2, 3     |
|                                                          | ICPC-2         | P72                                                                                                                                                                                     | 3        |
| Clozapine                                                | ATC            | N05AH02                                                                                                                                                                                 | 4        |

ATC, Anatomical Therapeutic Chemical Classification System; ICD-10, International Statistical Classification of Diseases and Related Health Problems, tenth revision; ICPC-2, International Classification of Primary Care, second edition; NCSP, Nordic Nomesco Classification of Surgical Procedures.

Registers: 1, Special Reimbursement Register for Medicine Expenses; 2, Care Register for Health Care; 3, Register of Primary Health Care Visits; 4, Prescription Centre database.

**Supplementary Table 2:** Vaccine effectiveness against laboratory-confirmed SARS-CoV-2 infection in healthcare workers.

|                                                 | Main analysis             |      |           |       |    | Sensitivity analysis                  |      |           |       |                                   |     |     |           |      |     |
|-------------------------------------------------|---------------------------|------|-----------|-------|----|---------------------------------------|------|-----------|-------|-----------------------------------|-----|-----|-----------|------|-----|
|                                                 | 27 Dec 2020 – 26 Aug 2021 |      |           |       |    | 27 Dec 2020 – 20 Jun 2021 (Pre-Delta) |      |           |       | 21 Jun 2021 – 26 Aug 2021 (Delta) |     |     |           |      |     |
|                                                 | Cases                     | AR   | VE        | CI95% |    | Cases                                 | AR   | VE        | CI95% | Cases                             | AR  | VE  | CI95%     |      |     |
| <b>Not vaccinated</b>                           | 3874                      | 2066 | Reference |       |    | 3287                                  | 1086 | Reference |       |                                   | 587 | 991 | Reference |      |     |
| <b>AdV vaccine (0-20 DSV)</b>                   | 43                        | 310  | 48        | 14    | 53 | 43                                    | 310  | 36        | 13    | 53                                | 0   | 0   | 100       | -Inf | 100 |
| <b>AdV vaccine (21-41 DSV)</b>                  | 48                        | 402  | 25        | -24   | 30 | 48                                    | 402  | 6         | -26   | 29                                | 0   | 0   | 100       | -Inf | 100 |
| <b>AdV vaccine (42+ DSV)</b>                    | 50                        | 7144 | 40        | -3    | 42 | 44                                    | 6877 | 15        | -15   | 37                                | 6   | 287 | 49        | -16  | 77  |
| <b>AdV vaccine + AdV vaccine (0-13 DSV)</b>     | < 5                       | 112  | 87        | -40   | 91 | < 5                                   | 88   | -16       | -727  | 84                                | < 5 | 25  | 79        | -51  | 97  |
| <b>AdV vaccine + AdV vaccine (14-90 DSV)</b>    | 5                         | 37   | 95        | 73    | 95 | 0                                     | 0    | 100       | -Inf  | 100                               | 5   | 37  | 88        | 71   | 95  |
| <b>AdV vaccine + AdV vaccine (91-180 DSV)</b>   | < 5                       | 38   | 83        | -166  | 95 | 0                                     | 0    | 100       | -Inf  | 100                               | < 5 | 38  | 62        | -177 | 95  |
| <b>AdV vaccine + AdV vaccine (181+ DSV)</b>     | -                         | -    | -         | -     | -  | -                                     | -    | -         | -     | -                                 | -   | -   | -         | -    | -   |
| <b>AdV vaccine + mRNA vaccine (0-13 DSV)</b>    | 7                         | 100  | 57        | -20   | 73 | 6                                     | 64   | 27        | -65   | 67                                | < 5 | 36  | 73        | -95  | 96  |
| <b>AdV vaccine + mRNA vaccine (14-90 DSV)</b>   | 38                        | 144  | 84        | 72    | 86 | 0                                     | 0    | 100       | -Inf  | 100                               | 38  | 144 | 80        | 72   | 86  |
| <b>AdV vaccine + mRNA vaccine (91-180 DSV)</b>  | 11                        | 180  | 65        | 30    | 79 | 0                                     | 0    | 100       | 100   | 100                               | 11  | 180 | 63        | 33   | 80  |
| <b>AdV vaccine + mRNA vaccine (181+ DSV)</b>    |                           |      |           |       |    |                                       |      |           |       |                                   |     |     |           |      |     |
| <b>mRNA vaccine (0-20 DSV)</b>                  | 283                       | 1779 | 25        | 11    | 31 | 208                                   | 1187 | 10        | -4    | 22                                | 75  | 599 | 46        | 31   | 57  |
| <b>mRNA vaccine (21-41 DSV)</b>                 | 184                       | 1015 | 49        | 39    | 55 | 78                                    | 572  | 40        | 25    | 52                                | 106 | 446 | 56        | 46   | 64  |
| <b>mRNA vaccine (42+ DSV)</b>                   | 542                       | 956  | 45        | 34    | 46 | 87                                    | 458  | 38        | 23    | 50                                | 455 | 501 | 45        | 37   | 51  |
| <b>mRNA vaccine + mRNA vaccine (0-13 DSV)</b>   | 110                       | 422  | 74        | 64    | 76 | 21                                    | 177  | 70        | 54    | 81                                | 89  | 245 | 71        | 64   | 77  |
| <b>mRNA vaccine + mRNA vaccine (14-90 DSV)</b>  | 162                       | 326  | 85        | 79    | 85 | 80                                    | 209  | 77        | 71    | 82                                | 82  | 118 | 85        | 81   | 88  |
| <b>mRNA vaccine + mRNA vaccine (91-180 DSV)</b> | 168                       | 377  | 67        | 55    | 68 | 28                                    | 100  | 55        | 34    | 69                                | 140 | 277 | 65        | 58   | 71  |
| <b>mRNA vaccine + mRNA vaccine (181+ DSV)</b>   | 103                       | 320  | 59        | 43    | 62 | -                                     | -    | -         | -     | -                                 | 103 | 320 | 56        | 46   | 65  |

AR, Attack rate (cumulative risk multiplied by 10<sup>5</sup>); CI, Confidence interval; DSV, Days since vaccination; VE, Vaccine effectiveness.

**Supplementary Table 3:** Vaccine effectiveness against Covid-19 related hospitalization in healthcare workers.

|                                                 | Main analysis             |     |           |       |     | Sensitivity analysis                  |    |           |       |     |                                   |     |           |       |     |
|-------------------------------------------------|---------------------------|-----|-----------|-------|-----|---------------------------------------|----|-----------|-------|-----|-----------------------------------|-----|-----------|-------|-----|
|                                                 | 27 Dec 2020 – 26 Oct 2021 |     |           |       |     | 27 Dec 2020 – 20 Jun 2021 (Pre-Delta) |    |           |       |     | 21 Jun 2021 – 26 Oct 2021 (Delta) |     |           |       |     |
|                                                 | Cases                     | AR  | VE        | CI95% |     | Cases                                 | AR | VE        | CI95% |     | Cases                             | AR  | VE        | CI95% |     |
| <b>Not vaccinated</b>                           | 220                       | 198 | Reference |       |     | 149                                   | 51 | Reference |       |     | 71                                | 147 | Reference |       |     |
| <b>AdV vaccine (0-20 DSV)</b>                   | < 5                       | 11  | 69        | -26   | 92  | < 5                                   | 11 | 70        | -22   | 93  | 0                                 | 0   | 100       | -Inf  | 100 |
| <b>AdV vaccine (21-41 DSV)</b>                  | 7                         | 45  | -17       | -156  | 47  | 7                                     | 45 | -13       | -149  | 49  | 0                                 | 0   | 100       | -Inf  | 100 |
| <b>AdV vaccine (42+ DSV)</b>                    | < 5                       | 52  | 88        | 10    | 98  | 0                                     | 0  | 100       | -Inf  | 100 | < 5                               | 52  | 42        | -330  | 92  |
| <b>AdV vaccine + AdV vaccine (0-13 DSV)</b>     | 0                         | 0   | 100       | -Inf  | 100 | 0                                     | 0  | 100       | -Inf  | 100 | 0                                 | 0   | 100       | -Inf  | 100 |
| <b>AdV vaccine + AdV vaccine (14-90 DSV)</b>    | 0                         | 0   | 100       | -Inf  | 100 | 0                                     | 0  | 100       | -Inf  | 100 | 0                                 | 0   | 100       | -Inf  | 100 |
| <b>AdV vaccine + AdV vaccine (91-180 DSV)</b>   | < 5                       | 28  | 88        | 48    | 97  | -                                     | -  | -         | -     | -   | < 5                               | 28  | 81        | 9     | 96  |
| <b>AdV vaccine + AdV vaccine (181+ DSV)</b>     | 0                         | 0   | 100       | -Inf  | 100 | -                                     | -  | -         | -     | -   | 0                                 | 0   | 100       | -Inf  | 100 |
| <b>AdV vaccine + mRNA vaccine (0-13 DSV)</b>    | 0                         | 0   | 100       | -Inf  | 100 | 0                                     | 0  | 100       | -Inf  | 100 | 0                                 | 0   | 100       | -Inf  | 100 |
| <b>AdV vaccine + mRNA vaccine (14-90 DSV)</b>   | 0                         | 0   | 100       | -Inf  | 100 | 0                                     | 0  | 100       | -Inf  | 100 | 0                                 | 0   | 100       | -Inf  | 100 |
| <b>AdV vaccine + mRNA vaccine (91-180 DSV)</b>  | < 5                       | 4   | 98        | 83    | 100 | -                                     | -  | -         | -     | -   | < 5                               | 4   | 97        | 81    | 100 |
| <b>AdV vaccine + mRNA vaccine (181+ DSV)</b>    | 0                         | 0   | 100       | -Inf  | 100 | -                                     | -  | -         | -     | -   | 0                                 | 0   | 100       | 100   | 100 |
| <b>mRNA vaccine (0-20 DSV)</b>                  | < 5                       | 95  | 87        | 58    | 96  | < 5                                   | 95 | 79        | 31    | 93  | 0                                 | 0   | 100       | -Inf  | 100 |
| <b>mRNA vaccine (21-41 DSV)</b>                 | < 5                       | 2   | 95        | 67    | 99  | < 5                                   | 2  | 89        | 15    | 98  | 0                                 | 0   | 100       | -Inf  | 100 |
| <b>mRNA vaccine (42+ DSV)</b>                   | 13                        | 30  | 83        | 70    | 91  | < 5                                   | 5  | 90        | 27    | 99  | 12                                | 25  | 83        | 68    | 91  |
| <b>mRNA vaccine + mRNA vaccine (0-13 DSV)</b>   | 0                         | 0   | 100       | -Inf  | 100 | 0                                     | 0  | 100       | -Inf  | 100 | 0                                 | 0   | 100       | -Inf  | 100 |
| <b>mRNA vaccine + mRNA vaccine (14-90 DSV)</b>  | < 5                       | 2   | 99        | 97    | 100 | < 5                                   | 2  | 95        | 64    | 99  | < 5                               | 1   | 100       | 97    | 100 |
| <b>mRNA vaccine + mRNA vaccine (91-180 DSV)</b> | < 5                       | 3   | 98        | 91    | 99  | 0                                     | 0  | 100       | -Inf  | 100 | < 5                               | 3   | 98        | 90    | 99  |
| <b>mRNA vaccine + mRNA vaccine (181+ DSV)</b>   | < 5                       | 2   | 98        | 89    | 100 | -                                     | -  | -         | -     | -   | < 5                               | 2   | 98        | 88    | 100 |

AR, Attack rate (cumulative risk multiplied by 10<sup>5</sup>); CI, Confidence interval; DSV, Days since vaccination; VE, Vaccine effectiveness.

**Supplementary Table 4:** Brand-specific mRNA vaccine effectiveness against laboratory-confirmed SARS-COV-2 infection and Covid-19 related hospitalization in healthcare workers excluding those vaccinated first with AdV vaccine.

|                                           | SARS-CoV-2 infection      |      |     |           |     | Covid-19 related hospitalization |     |     |           |     |
|-------------------------------------------|---------------------------|------|-----|-----------|-----|----------------------------------|-----|-----|-----------|-----|
|                                           | 27 Dec 2020 – 26 Aug 2021 |      |     |           |     | 27 Dec 2020 – 26 Oct 2021        |     |     |           |     |
|                                           | Cases                     | AR   | VE  | CI95%     |     | Cases                            | AR  | VE  | CI95%     |     |
| <b>Not vaccinated</b>                     | 3838                      | 2141 |     | Reference |     | 218                              | 201 |     | Reference |     |
| <b>Comirnaty (0-20 DSV)</b>               | 265                       | 1905 | 21  | 11        | 31  | < 5                              | 111 | 85  | 54        | 95  |
| <b>Comirnaty (21-41 DSV)</b>              | 174                       | 1062 | 47  | 38        | 55  | < 5                              | 3   | 95  | 63        | 99  |
| <b>Comirnaty (42+ DSV)</b>                | 507                       | 985  | 40  | 33        | 46  | 12                               | 34  | 82  | 68        | 90  |
| <b>Comirnaty + Comirnaty (0-13 DSV)</b>   | 104                       | 441  | 71  | 64        | 76  | 0                                | 0   | 100 | -Inf      | 100 |
| <b>Comirnaty + Comirnaty (14-90 DSV)</b>  | 154                       | 323  | 83  | 80        | 85  | < 5                              | 2   | 99  | 97        | 100 |
| <b>Comirnaty + Comirnaty (91-180 DSV)</b> | 167                       | 377  | 63  | 56        | 69  | < 5                              | 3   | 98  | 91        | 99  |
| <b>Comirnaty + Comirnaty (181+ DSV)</b>   | 103                       | 320  | 55  | 45        | 64  | < 5                              | 2   | 98  | 89        | 100 |
| <b>Comirnaty + Spikevax (0-13 DSV)</b>    | < 5                       | 173  | 65  | -146      | 95  | 0                                | 0   | 100 | -Inf      | 100 |
| <b>Comirnaty + Spikevax (14-90 DSV)</b>   | 0                         | 0    | 100 | -Inf      | 100 | 0                                | 0   | 100 | -Inf      | 100 |
| <b>Comirnaty + Spikevax (91-180 DSV)</b>  | 0                         | 0    | 100 | -Inf      | 100 | 0                                | 0   | 100 | -Inf      | 100 |
| <b>Comirnaty + Spikevax (181+ DSV)</b>    | 0                         | 0    | 100 | -Inf      | 100 | 0                                | 0   | 100 | -Inf      | 100 |
| <b>Spikevax (0-20 DSV)</b>                | 18                        | 551  | 55  | 29        | 72  | 0                                | 0   | 100 | -Inf      | 100 |
| <b>Spikevax (21-41 DSV)</b>               | 10                        | 354  | 72  | 47        | 85  | 0                                | 0   | 100 | -Inf      | 100 |
| <b>Spikevax (42+ DSV)</b>                 | 35                        | 393  | 61  | 45        | 72  | < 5                              | 7   | 89  | 22        | 98  |
| <b>Spikevax + Comirnaty (0-13 DSV)</b>    | 0                         | 0    | 100 | -Inf      | 100 | 0                                | 0   | 100 | -Inf      | 100 |
| <b>Spikevax + Comirnaty (14-90 DSV)</b>   | 0                         | 0    | 100 | -Inf      | 100 | 0                                | 0   | 100 | -Inf      | 100 |
| <b>Spikevax + Comirnaty (91-180 DSV)</b>  | 0                         | 0    | 100 | -Inf      | 100 | 0                                | 0   | 100 | -Inf      | 100 |
| <b>Spikevax + Comirnaty (181+ DSV)</b>    | 0                         | 0    | 100 | -Inf      | 100 | 0                                | 0   | 100 | 100       | 100 |
| <b>Spikevax + Spikevax (0-13 DSV)</b>     | 5                         | 113  | 83  | 60        | 93  | 0                                | 0   | 100 | -Inf      | 100 |
| <b>Spikevax + Spikevax (14-90 DSV)</b>    | 8                         | 322  | 84  | 68        | 92  | 0                                | 0   | 100 | -Inf      | 100 |
| <b>Spikevax + Spikevax (91-180 DSV)</b>   | < 5                       | 179  | 69  | -124      | 96  | 0                                | 0   | 100 | -Inf      | 100 |
| <b>Spikevax + Spikevax (181+ DSV)</b>     |                           |      |     |           |     | 0                                | 0   | 100 | -Inf      | 100 |

AR, Attack rate (cumulative risk multiplied by  $10^5$ ); CI, Confidence interval; DSV, Days since vaccination; VE, Vaccine effectiveness.

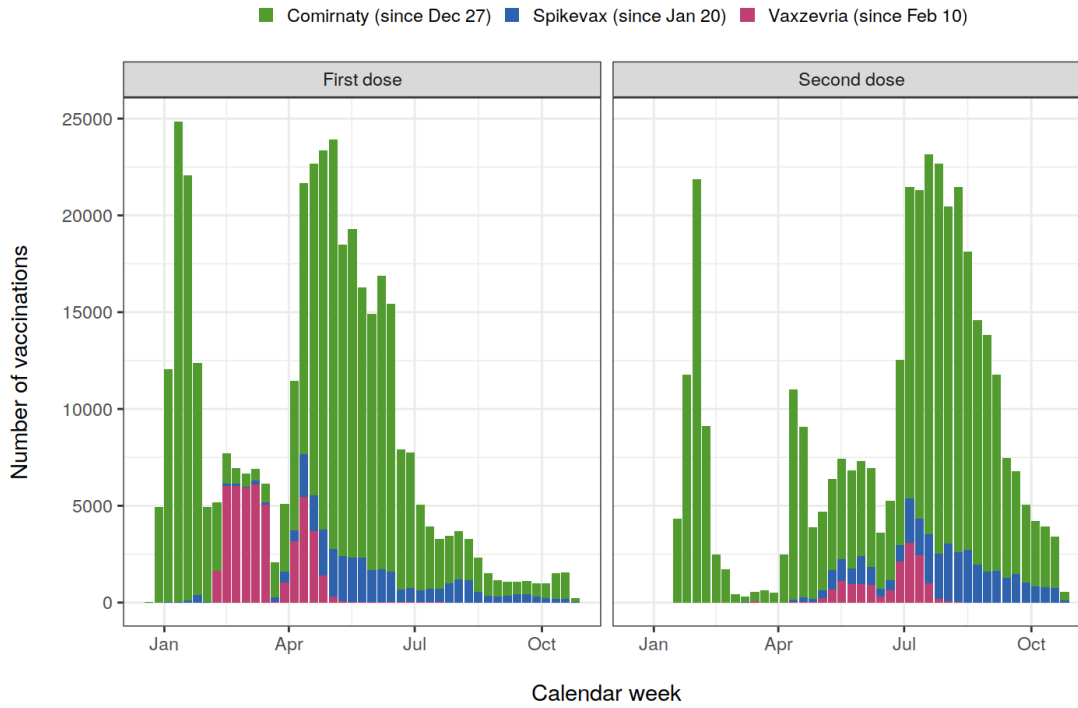

**Supplementary Figure 1.** Number of vaccinations administered in healthcare workers by calendar week.

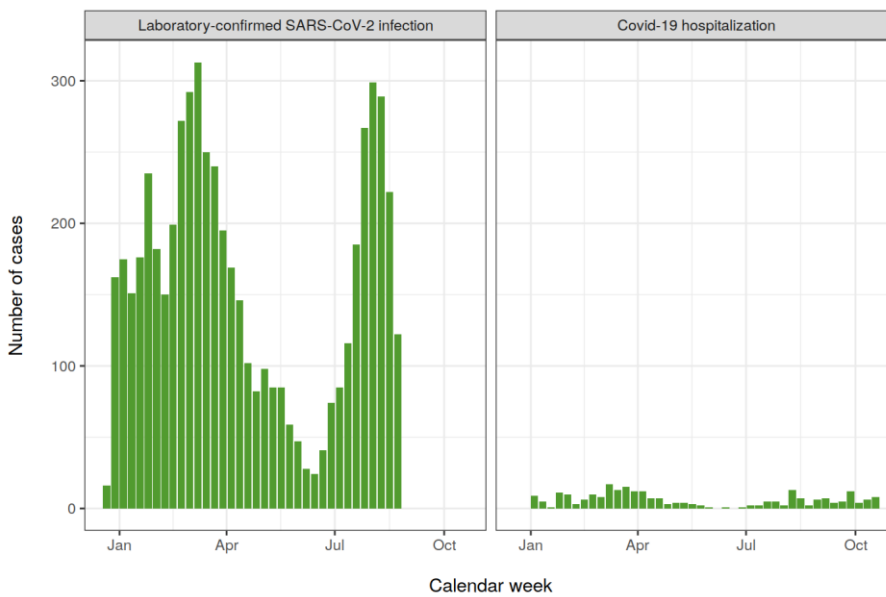

**Supplementary Figure 2:** Number of laboratory-confirmed SARS-CoV-2 infections and Covid-19 related hospitalizations in healthcare workers by calendar week.
