# Supplementary material for: Cohort study of Covid-19 vaccine effectiveness among healthcare workers in Finland, December 2020 - October 2021
Source: bioRxiv or medRxiv preprint supplement (doi:10.1101/2021.11.03.21265791), 2021-11-08
Supplement: Supplementary file [file media-2.pdf]

Professor Mika Salminen,  
Director of the Department for Health Security  
Finnish Institute for Health and Welfare / Terveysten ja Hyvinvoinnin Laitos  
[Mika.salminen@thl.fi](mailto:Mika.salminen@thl.fi)

To whom it may concern:

Subject: Cohort study of Covid-19 vaccine effectiveness among healthcare workers in Finland, December 2020 - October 2021

As director of the department for Health security of the Finnish Institute for Health and Welfare, I certify that:

- I am the competent authority for assessing whether research requires institutional ethical review or if the Finnish communicable diseases law (Tartuntatautilaki 1227/2016) and the law on the duties of the Finnish Institute for Health (Laki Terveysten ja hyvinvoinnin laitoksesta 668/2008) and Welfare allows the implementation of the research without seeking further ethical review.
- The research presented by Poukka et al in "**Cohort study of Covid-19 vaccine effectiveness among healthcare workers in Finland, December 2020 - October 2021**" did not require further ethical review before implementation as its aim was to monitor vaccine effectiveness of infectious disease (Tartuntatautilaki 1227/2016).

Helsinki, October 29th 2021



Prof Mika Salminen
